# Supplementary material
Source: publisher figshare collection journal article supplement (https://acs.figshare.com/ndownloader/files/5183344)
Supplement: Supplementary file 1 [file 5183344]

data_shelxl

_audit_creation_method            SHELXL-97

_chemical_formula_sum
  'C16 H14 O3'
_chemical_formula_weight          254.27

loop_
  _atom_type_symbol
  _atom_type_description
  _atom_type_scat_dispersion_real
  _atom_type_scat_dispersion_imag
  _atom_type_scat_source
  'C'  'C'   0.0033   0.0016
  'International Tables Vol C Tables 4.2.6.8 and 6.1.1.4'
  'H'  'H'   0.0000   0.0000
  'International Tables Vol C Tables 4.2.6.8 and 6.1.1.4'
  'O'  'O'   0.0106   0.0060
  'International Tables Vol C Tables 4.2.6.8 and 6.1.1.4'

_symmetry_cell_setting            monoclinic
_symmetry_space_group_name_H-M    P21/c

loop_
  _symmetry_equiv_pos_as_xyz
  'x, y, z'
  '-x, y+1/2, -z+1/2'
  '-x, -y, -z'
  'x, -y-1/2, z-1/2'

_cell_length_a                    14.5102(13)
_cell_length_b                    11.6817(10)
_cell_length_c                    7.7251(7)
_cell_angle_alpha                 90
_cell_angle_beta                  103.101(2)
_cell_angle_gamma                 90
_cell_volume                      1275.4(2)
_cell_formula_units_Z             4
_cell_measurement_temperature     223(2)
_cell_measurement_reflns_used     3379
_cell_measurement_theta_min       2.3
_cell_measurement_theta_max       29.8

_exptl_crystal_description        block
_exptl_crystal_colour             colourless
_exptl_crystal_size_max           0.55
_exptl_crystal_size_mid           0.52
_exptl_crystal_size_min           0.36
_exptl_crystal_density_meas       ?
_exptl_crystal_density_diffrn     1.324
_exptl_crystal_density_method     'not measured'
_exptl_crystal_F_000              536
_exptl_absorpt_coefficient_mu     0.091
_exptl_absorpt_correction_type    'multi-scan'
_exptl_absorpt_correction_T_min   0.765
_exptl_absorpt_correction_T_max   1
_exptl_absorpt_process_details    '(SADABS, Bruker, 2000 & Blessing, 1995)'

_diffrn_ambient_temperature       223(2)
_diffrn_radiation_wavelength      0.71069
_diffrn_radiation_type            MoK\a
_diffrn_radiation_source          'fine-focus sealed tube'
_diffrn_radiation_monochromator   graphite
_diffrn_measurement_device_type   'Bruker AXS SMART CCD'
_diffrn_measurement_method        '\w scans'
_diffrn_detector_area_resol_mean  ?
_diffrn_standards_number          0
_diffrn_standards_interval_count  ?
_diffrn_standards_interval_time   ?
_diffrn_standards_decay_%         0
_diffrn_reflns_number             10264
_diffrn_reflns_av_R_equivalents   0.037
_diffrn_reflns_av_sigmaI/netI     0.051
_diffrn_reflns_limit_h_min        -19
_diffrn_reflns_limit_h_max        20
_diffrn_reflns_limit_k_min        -16
_diffrn_reflns_limit_k_max        14
_diffrn_reflns_limit_l_min        -10
_diffrn_reflns_limit_l_max        10
_diffrn_reflns_theta_min          2.3
_diffrn_reflns_theta_max          30.1
_reflns_number_total              3721
_reflns_number_gt                 3024
_reflns_threshold_expression      'I>2\s(I)'

_computing_data_collection        'SMART (Bruker, 2000)'
_computing_cell_refinement        'SAINT (Bruker, 2000)'
_computing_data_reduction        'SHELXTL (Bruker, 2000)'
_computing_structure_solution    'SIR92 (Altomare et al., 1994)'
_computing_structure_refinement  'SHELXL-97 (Sheldrick, 1997)'
_computing_molecular_graphics    'ORTEP-II (Johnson, 1976)'
_computing_publication_material  'SHELXL-97 (Sheldrick, 1997)'

_refine_special_details
;
  Refinement of F^2^ against ALL reflections.  The weighted R-factor wR and
  goodness of fit S are based on F^2^, conventional R-factors R are based
  on F, with F set to zero for negative F^2^. The threshold expression of
  F^2^ > 2sigma(F^2^) is used only for calculating R-factors(gt) etc. and is
  not relevant to the choice of reflections for refinement.  R-factors based
  on F^2^ are statistically about twice as large as those based on F, and R-
  factors based on ALL data will be even larger.
;

_refine_ls_structure_factor_coef  Fsqd
_refine_ls_matrix_type            full
_refine_ls_weighting_scheme       calc
_refine_ls_weighting_details
  'calc w=1/[\s^2^(Fo^2^)+(0.0821P)^2^+0.2198P] where P=(Fo^2^+2Fc^2^)/3'
_atom_sites_solution_primary      direct
_atom_sites_solution_secondary    difmap
_atom_sites_solution_hydrogens    geom
_refine_ls_hydrogen_treatment     mixed
_refine_ls_extinction_method      none
_refine_ls_extinction_coef        ?
_refine_ls_number_reflns          3721
_refine_ls_number_parameters      172
_refine_ls_number_restraints      0
_refine_ls_R_factor_all           0.067
_refine_ls_R_factor_gt            0.057
_refine_ls_wR_factor_ref          0.157
_refine_ls_wR_factor_gt           0.149
_refine_ls_goodness_of_fit_ref    1.05
_refine_ls_restrained_S_all       1.05
_refine_ls_shift/su_max           '<0.001'
_refine_ls_shift/su_mean          0.000

loop_
  _atom_site_label
  _atom_site_type_symbol
  _atom_site_fract_x
  _atom_site_fract_y
  _atom_site_fract_z
  _atom_site_U_iso_or_equiv
  _atom_site_adp_type
  _atom_site_occupancy
  _atom_site_symmetry_multiplicity
  _atom_site_calc_flag
  _atom_site_refinement_flags
  _atom_site_disorder_assembly
  _atom_site_disorder_group
O1 O 0.40616(7) 0.78173(9) 0.40921(15) 0.0438(3) Uani 1 1 d . . .
O21 O 0.55088(6) 0.62286(9) 0.45701(12) 0.0370(2) Uani 1 1 d . . .
O31 O 0.58144(6) 0.59977(9) -0.00168(13) 0.0399(3) Uani 1 1 d . . .
H31 H 0.5298 0.6336 -0.0251 0.059 Uiso 1 1 calc R . .
C1 C 0.38695(8) 0.68938(11) 0.33623(17) 0.0301(3) Uani 1 1 d . . .
C11 C 0.28730(8) 0.65796(11) 0.25633(16) 0.0278(3) Uani 1 1 d . . .
C12 C 0.21688(9) 0.73396(12) 0.27864(18) 0.0333(3) Uani 1 1 d . . .
H12 H 0.2334 0.8014 0.3447 0.040 Uiso 1 1 calc R . .
C13 C 0.12282(9) 0.71080(13) 0.2042(2) 0.0392(3) Uani 1 1 d . . .
H13 H 0.0756 0.7621 0.2204 0.047 Uiso 1 1 calc R . .
C14 C 0.09835(9) 0.61209(13) 0.1061(2) 0.0413(3) Uani 1 1 d . . .
H14 H 0.0344 0.5967 0.0546 0.050 Uiso 1 1 calc R . .
C15 C 0.16737(9) 0.53583(12) 0.0832(2) 0.0398(3) Uani 1 1 d . . .
H15 H 0.1503 0.4689 0.0160 0.048 Uiso 1 1 calc R . .
C16 C 0.26177(8) 0.55769(11) 0.15896(18) 0.0328(3) Uani 1 1 d . . .
H16 H 0.3085 0.5051 0.1448 0.039 Uiso 1 1 calc R . .
C22 C 0.46447(8) 0.60714(11) 0.32363(17) 0.0299(3) Uani 1 1 d . . .
H22 H 0.4459 0.5277 0.2867 0.036 Uiso 1 1 calc R . .
C23 C 0.55099(8) 0.65268(10) 0.27877(16) 0.0281(3) Uani 1 1 d . . .
H23 H 0.5509 0.7356 0.2523 0.034 Uiso 1 1 calc R . .
C32 C 0.60850(8) 0.57829(11) 0.18385(18) 0.0309(3) Uani 1 1 d . . .
H32 H 0.5956 0.4970 0.2059 0.037 Uiso 1 1 calc R . .
C33 C 0.71312(8) 0.60086(10) 0.25028(16) 0.0285(3) Uani 1 1 d . . .
C34 C 0.76857(9) 0.52547(12) 0.36779(19) 0.0367(3) Uani 1 1 d . . .
H34 H 0.7411 0.4598 0.4052 0.044 Uiso 1 1 calc R . .
C35 C 0.86455(10) 0.54634(15) 0.4307(2) 0.0474(4) Uani 1 1 d . . .
H35 H 0.9019 0.4946 0.5100 0.057 Uiso 1 1 calc R . .
C36 C 0.90513(10) 0.64263(15) 0.3772(2) 0.0462(4) Uani 1 1 d . . .
H36 H 0.9702 0.6564 0.4194 0.055 Uiso 1 1 calc R . .
C37 C 0.85040(10) 0.71854(14) 0.2622(2) 0.0436(3) Uani 1 1 d . . .
H37 H 0.8781 0.7847 0.2266 0.052 Uiso 1 1 calc R . .
C38 C 0.75437(9) 0.69814(12) 0.1981(2) 0.0372(3) Uani 1 1 d . . .
H38 H 0.7173 0.7504 0.1193 0.045 Uiso 1 1 calc R . .

loop_
  _atom_site_aniso_label
  _atom_site_aniso_U_11
  _atom_site_aniso_U_22
  _atom_site_aniso_U_33
  _atom_site_aniso_U_23
  _atom_site_aniso_U_13
  _atom_site_aniso_U_12
O1 0.0286(5) 0.0444(6) 0.0578(7) -0.0192(5) 0.0086(4) -0.0058(4)
O21 0.0256(4) 0.0505(6) 0.0325(5) 0.0062(4) 0.0013(3) -0.0021(4)
O31 0.0286(4) 0.0516(6) 0.0372(5) -0.0072(4) 0.0025(4) 0.0091(4)
C1 0.0248(5) 0.0354(6) 0.0308(6) -0.0014(5) 0.0079(4) -0.0044(4)
C11 0.0240(5) 0.0311(6) 0.0292(6) -0.0002(4) 0.0083(4) -0.0033(4)
C12 0.0285(6) 0.0342(7) 0.0377(7) -0.0048(5) 0.0088(5) -0.0011(5)
C13 0.0256(6) 0.0449(8) 0.0480(8) -0.0022(6) 0.0099(5) 0.0031(5)
C14 0.0238(6) 0.0491(8) 0.0497(8) -0.0038(6) 0.0059(5) -0.0068(5)
C15 0.0312(6) 0.0388(7) 0.0492(8) -0.0098(6) 0.0086(6) -0.0096(5)
C16 0.0269(6) 0.0329(6) 0.0399(7) -0.0046(5) 0.0102(5) -0.0024(4)
C22 0.0231(5) 0.0309(6) 0.0343(6) 0.0036(5) 0.0033(4) -0.0015(4)
C23 0.0233(5) 0.0271(6) 0.0334(6) 0.0014(4) 0.0053(4) 0.0004(4)
C32 0.0242(5) 0.0276(6) 0.0399(7) -0.0006(5) 0.0052(5) 0.0021(4)
C33 0.0243(5) 0.0294(6) 0.0316(6) -0.0001(4) 0.0060(4) 0.0037(4)
C34 0.0320(6) 0.0368(7) 0.0411(7) 0.0073(5) 0.0077(5) 0.0071(5)
C35 0.0324(7) 0.0603(10) 0.0449(8) 0.0079(7) -0.0008(6) 0.0141(6)
C36 0.0261(6) 0.0660(10) 0.0449(8) -0.0075(7) 0.0049(5) -0.0013(6)
C37 0.0356(7) 0.0499(8) 0.0457(8) -0.0014(6) 0.0103(6) -0.0109(6)
C38 0.0317(6) 0.0368(7) 0.0407(7) 0.0061(5) 0.0034(5) -0.0007(5)

_geom_special_details
;
  All esds (except the esd in the dihedral angle between two l.s. planes)
  are estimated using the full covariance matrix.  The cell esds are taken
  into account individually in the estimation of esds in distances, angles
  and torsion angles; correlations between esds in cell parameters are only
  used when they are defined by crystal symmetry.  An approximate (isotropic)
  treatment of cell esds is used for estimating esds involving l.s. planes.
;

loop_
  _geom_bond_atom_site_label_1
  _geom_bond_atom_site_label_2
  _geom_bond_distance
  _geom_bond_site_symmetry_2
  _geom_bond_publ_flag
O1 C1 1.2200(16) . ?
O21 C23 1.4207(15) . ?
O21 C22 1.4428(14) . ?
O31 C32 1.4199(16) . ?
C1 C11 1.4839(16) . ?
C1 C22 1.4990(17) . ?
C11 C12 1.3934(17) . ?
C11 C16 1.3959(18) . ?
C12 C13 1.3823(18) . ?
C13 C14 1.381(2) . ?
C14 C15 1.381(2) . ?
C15 C16 1.3859(17) . ?
C22 C23 1.4752(16) . ?
C23 C32 1.5055(17) . ?
C32 C33 1.5114(16) . ?
C33 C38 1.3862(18) . ?
C33 C34 1.3842(17) . ?
C34 C35 1.3887(19) . ?
C35 C36 1.376(2) . ?
C36 C37 1.374(2) . ?
C37 C38 1.3895(19) . ?

loop_
  _geom_angle_atom_site_label_1
  _geom_angle_atom_site_label_2
  _geom_angle_atom_site_label_3
  _geom_angle
  _geom_angle_site_symmetry_1
  _geom_angle_site_symmetry_3
  _geom_angle_publ_flag
C23 O21 C22 62.01(8) . . ?
O1 C1 C11 120.66(11) . . ?
O1 C1 C22 120.03(11) . . ?
C11 C1 C22 119.29(11) . . ?
C12 C11 C16 119.26(11) . . ?
C12 C11 C1 117.62(11) . . ?
C16 C11 C1 123.10(11) . . ?
C13 C12 C11 120.42(12) . . ?
C12 C13 C14 119.89(12) . . ?
C15 C14 C13 120.32(12) . . ?
C14 C15 C16 120.20(13) . . ?
C15 C16 C11 119.89(12) . . ?
O21 C22 C23 58.26(7) . . ?
O21 C22 C1 114.55(10) . . ?
C23 C22 C1 118.38(11) . . ?
O21 C23 C22 59.73(7) . . ?
O21 C23 C32 116.94(10) . . ?
C22 C23 C32 120.10(11) . . ?
O31 C32 C23 109.43(10) . . ?
O31 C32 C33 109.79(10) . . ?
C23 C32 C33 111.03(10) . . ?
C38 C33 C34 119.16(12) . . ?
C38 C33 C32 120.73(11) . . ?
C34 C33 C32 120.09(11) . . ?
C33 C34 C35 120.37(13) . . ?
C36 C35 C34 120.14(13) . . ?
C37 C36 C35 119.87(13) . . ?
C36 C37 C38 120.38(14) . . ?
C33 C38 C37 120.08(13) . . ?

_diffrn_measured_fraction_theta_max    0.995
_diffrn_reflns_theta_full              30.1
_diffrn_measured_fraction_theta_full   0.995
_refine_diff_density_max    0.39
_refine_diff_density_min   -0.27
_refine_diff_density_rms    0.059
